# Supplementary material for: Reducing ligation bias of small RNAs in libraries for next generation sequencing
Source: PubMed Central journal article supplement (PMC3489589; doi:10.1186/1758-907x-3-4), 2012-05-30
Supplement: 1758-907X-3-4-S2.pdf [file 1758-907X-3-4-S2.pdf]

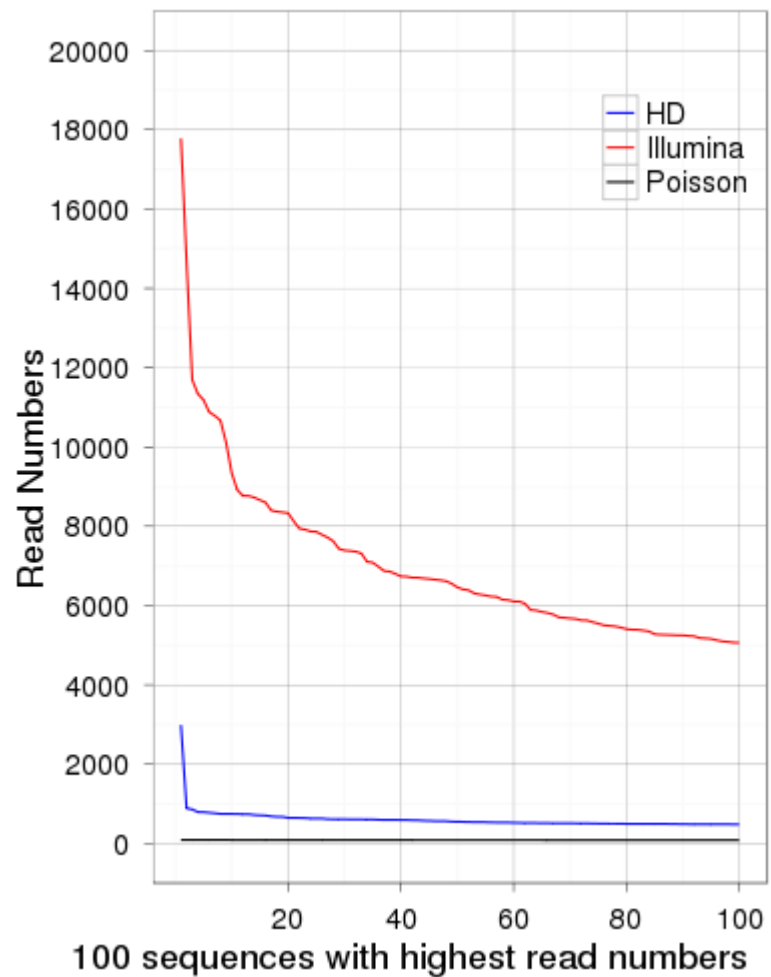

**Supplementary figure 1.** Number of reads for the 100 most abundant sequences in the N9 libraries, prepared with Illumina (red) or HD adapters (blue).
