# Supplementary material for: Reducing ligation bias of small RNAs in libraries for next generation sequencing
Source: PubMed Central journal article supplement (PMC3489589; doi:10.1186/1758-907x-3-4), 2012-05-30
Supplement: 1758-907X-3-4-S4.pdf [file 1758-907X-3-4-S4.pdf]

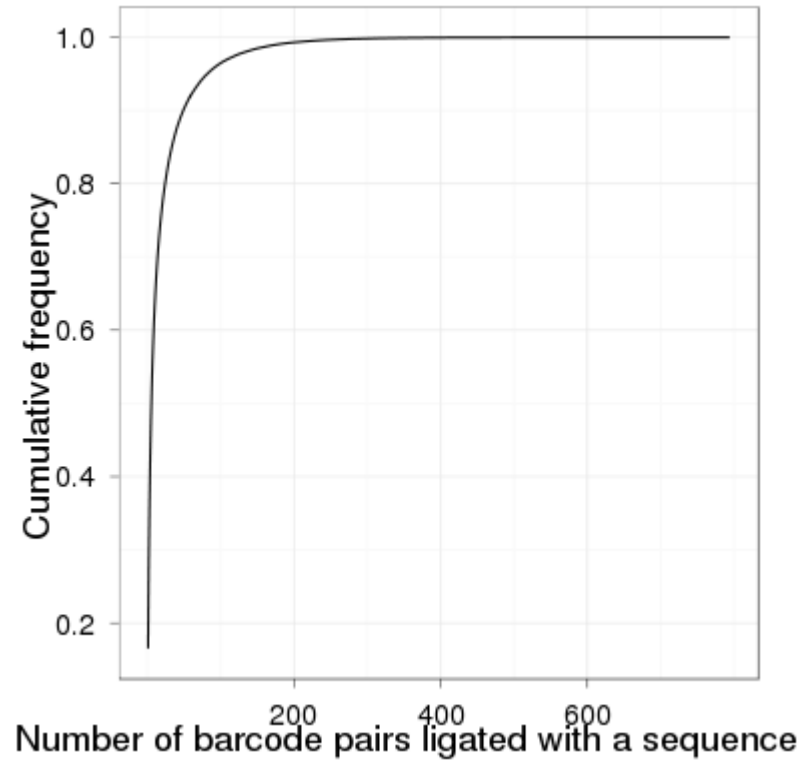

**Supplementary figure 3.** Number of barcode pairs that capture sequences in N9 library prepared with HD adapters. The majority of sequences are captured by a number of barcodes much smaller than the total number of barcode combinations (65,536).
