# Supplementary material for: Reducing ligation bias of small RNAs in libraries for next generation sequencing
Source: PubMed Central journal article supplement (PMC3489589; doi:10.1186/1758-907x-3-4), 2012-05-30
Supplement: 1758-907X-3-4-S5.pdf [file 1758-907X-3-4-S5.pdf]

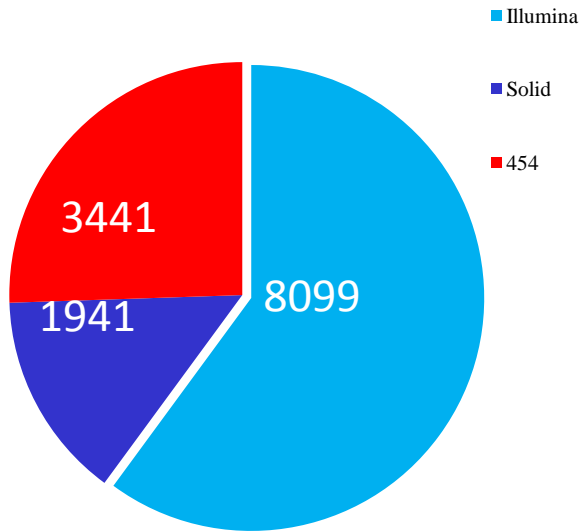

**Supplementary figure 6.** Most miRNAs were discovered with Illumina and 454 technology. Proportion of miRNAs that were discovered with the main NGS technologies as identified in miRBase.
