# Supplementary material for: Reducing ligation bias of small RNAs in libraries for next generation sequencing
Source: PubMed Central journal article supplement (PMC3489589; doi:10.1186/1758-907x-3-4), 2012-05-30
Supplement: 1758-907X-3-4-S7.pdf [file 1758-907X-3-4-S7.pdf]

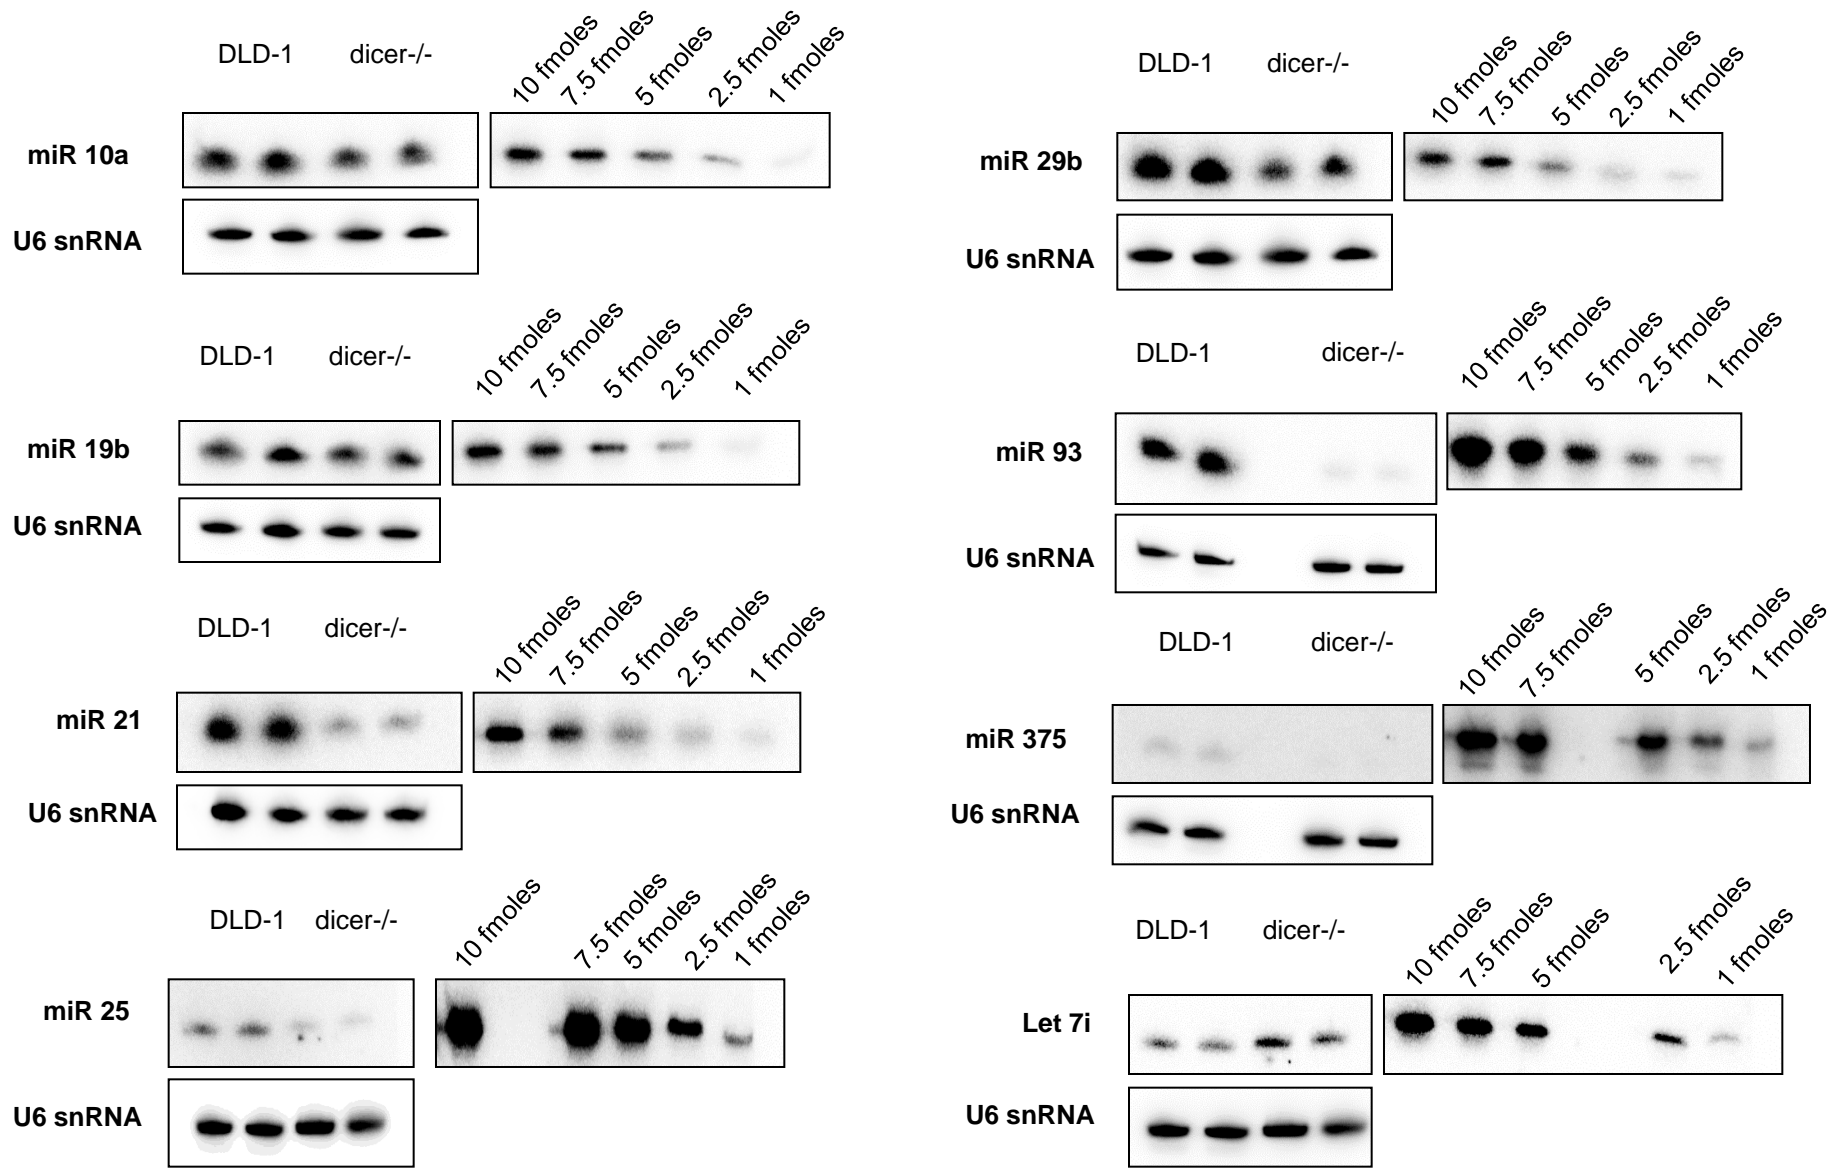

**Supplementary Figure 4.** Quantification of known microRNAs in DLD-1 cells (epithelial adenocarcinoma cells), both wild-type and *dicer*<sup>-/-</sup>. Total RNA (10µg) was analysed via Northern blot and microRNA experimental samples were quantified using a serial dilution of synthetic oligonucleotide sequences corresponding with the miR of interest. The small nuclear RNA U6 was used as a loading control, and this U6 image has been duplicated where different microRNAs were analysed on the same membrane (miRs 10a & 29b and miRs 25 & Let 7i).
