# Supplementary material for: Reducing ligation bias of small RNAs in libraries for next generation sequencing
Source: PubMed Central journal article supplement (PMC3489589; doi:10.1186/1758-907x-3-4), 2012-05-30
Supplement: 1758-907X-3-4-S10.pdf [file 1758-907X-3-4-S10.pdf]

Supplementary Figure 5.

The secondary structure of each new miRNA is shown in bracket notation and also where all the sequencing reads map on the pre-miRNA. The two numbers on the right-hand side are the sums of counts for the two HD wild type replicates (left) and for the two Illumina wild type replicates (right).

chr17 40646791-40646812

TTAGGTTTGGTGCAAAAGTTATTGCGGTTTTGGCTGCCAAAAGAAATGGCCAAAACCGCAGTAACTTTTGTGCCAACCTAA

((((((((.....))))))))))

|                        |    |   |
|------------------------|----|---|
| AAAAGTTATTGCGGTTTTGGCT | 8, | 1 |
| AAAAGTTATTGCGGTTTTGGC  | 1, | 0 |
| AAAAGTTATTGCGGTTTTGG   | 1, | 1 |

chr1 219563096-219563117

TATATTAGGTTGGCGTGAAAGTAATTTTCGGTTTTTGCCATTACTTTTAGTGCCAAAATCGCAATTACTTTTGTGCCAACCTAATATA

((((((((.....))))))))))

|                          |    |   |
|--------------------------|----|---|
| AAAGTAATTTTCGGTTTTTGCCA  | 2, | 0 |
| AAAGTAATTTTCGGTTTTTGCCAT | 1, | 0 |
| AAAGTAATTTTCGGTTTTTGC    | 1, | 3 |
| AAAGTAATTTTCGGTTTTTGCC   | 1, | 0 |
| AAGTAATTTTCGGTTTTTGCCAT  | 8, | 1 |
| AAGTAATTTTCGGTTTTTGCCA   | 5, | 2 |

AAGTAATTCGGTTTTTGCCATT

4, 0

AGTAATTCGGTTTTTGCCATT

3, 0

CAAAAATCGCAATTACTTTTG

0, 2

chr3 129618465-129618486

AGGTTGGTGCAAAGTAATTCGGTTTTTGCCATTACTCACTGCATTACTTTGGCAAAAACCAAATTACTTTGCACCAACCT

(((((((((((<<<<<<<<<<<<<<<<<<<<<<((.....)))))))))))).)))))))))))))

CAAAAGTAATTCGGTTTTTGCC

1, 2

CAAAAGTAATTCGGTTTTTG

1, 0

AAAAGTAATTCGGTTTTTGC

5, 0

AAAAGTAATTCGGTTTTTGCC

3, 1

AAAGTAATTCGGTTTTTGCCA

2, 0

AAAGTAATTCGGTTTTTGCC

1, 0

AAAGTAATTCGGTTTTTGCCAT

1, 0

AAAGTAATTCGGTTTTTGC

1, 3

AAGTAATTCGGTTTTTGCCAT

8, 1

AAGTAATTCGGTTTTTGCCA

5, 2

AAGTAATTCGGTTTTTGCCATT

4, 0

AGTAATTCGGTTTTTGCCATT

3, 0

CAAAAACCAAATTACTTTTGC

1, 0

chr5 161136476-161136497

AGTATTAATTGATGGTGCAAAGTAATTTTCGGTTTTTGCCATTATTTTAAATGGCAAACCAGCAATTATTTTGCACCAATCTAATATT

(((((....(((((((((<<<<<<<-<<<<<<<<<((....)))))).)))))).)))))).)))))).))))))))))

|                          |    |   |
|--------------------------|----|---|
| CAAAGTAATTTTCGGTTTTTGCC  | 1, | 2 |
| CAAAGTAATTTTCGGTTTTTG    | 1, | 0 |
| AAAAGTAATTTTCGGTTTTTGC   | 5, | 0 |
| AAAAGTAATTTTCGGTTTTTGCC  | 3, | 1 |
| AAAGTAATTTTCGGTTTTTGCCA  | 2, | 0 |
| AAAGTAATTTTCGGTTTTTGCCAT | 1, | 0 |
| AAAGTAATTTTCGGTTTTTGCC   | 1, | 0 |
| AAAGTAATTTTCGGTTTTTGC    | 1, | 3 |
| AAGTAATTTTCGGTTTTTGCCAT  | 8, | 1 |
| AAGTAATTTTCGGTTTTTGCCA   | 5, | 2 |
| AAGTAATTTTCGGTTTTTGCCATT | 4, | 0 |
| AGTAATTTTCGGTTTTTGCCATT  | 3, | 0 |
| AAAAACCGCAATTATTTTGC     | 6, | 0 |
| AAAACCGCAATTATTTTGC      | 2, | 0 |

chr15 90393919-90393942

GAAAAAATCAGTGAATGCCTTGAACCTAACACACTGCCTTTTATGTGGTAGGTACAGTGGGCTCACTGAAACATTC

((.....-<<<<<<--<<<<<<-<<<<<-<(((.....))))).))))).))..))))))))).....))

|                            |    |    |
|----------------------------|----|----|
| AATCAGTGAATGCCTTGAACCTAAC  | 1, | 17 |
| AATCAGTGAATGCCTTGAACCTA    | 0, | 3  |
| AATCAGTGAATGCCTTGAACC      | 0, | 2  |
| AATCAGTGAATGCCTTGAACCT     | 0, | 1  |
| ATCAGTGAATGCCTTGAACCTAAC   | 7, | 50 |
| ATCAGTGAATGCCTTGAACCTA     | 5, | 2  |
| ATCAGTGAATGCCTTGAACCTAA    | 1, | 0  |
| ATCAGTGAATGCCTTGAACC       | 0, | 1  |
| ATCAGTGAATGCCTTGAACCTAACAC | 0, | 1  |
| TCAGTGAATGCCTTGAACCTAAC    | 2, | 9  |
| TCAGTGAATGCCTTGAACCTAACA   | 2, | 2  |
| GTAGGTACAGTGGGCTCACTGAAA   | 0, | 3  |
| GTAGGTACAGTGGGCTCACTGAA    | 0, | 1  |
| GTAGGTACAGTGGGCTCACTGA     | 0, | 1  |
| TAGGTACAGTGGGCTCACTGA      | 1, | 1  |
| TAGGTACAGTGGGCTCACTGAAAC   | 0, | 2  |
| TAGGTACAGTGGGCTCACTGAAA    | 0, | 3  |



|                        |    |    |
|------------------------|----|----|
| ATTAGGTAGTGGCAGTGAACA  | 5, | 42 |
| ATTAGGTAGTGGCAGTGAACA  | 5, | 42 |
| ATTAGGTAGTGGCAGTGAACA  | 5, | 42 |
| ATTAGGTAGTGGCAGTGAAC   | 1, | 23 |
| ATTAGGTAGTGGCAGTGAAC   | 1, | 23 |
| ATTAGGTAGTGGCAGTGAAC   | 1, | 23 |
| ATTAGGTAGTGGCAGTGAAC   | 1, | 23 |
| ATTAGGTAGTGGCAGTGAACAC | 0, | 2  |
| ATTAGGTAGTGGCAGTGAACAC | 0, | 2  |
| ATTAGGTAGTGGCAGTGAACAC | 0, | 2  |
| ATTAGGTAGTGGCAGTGAACAC | 0, | 2  |
| ATTAGGTAGTGGCAGTGGAA   | 0, | 5  |
| ATTAGGTAGTGGCAGTGGAA   | 0, | 5  |
| ATTAGGTAGTGGCAGTGGAA   | 0, | 5  |
| ATTAGGTAGTGGCAGTGGAA   | 0, | 5  |
| TTAGGTAGTGGCAGTGAACA   | 0, | 5  |
| TTAGGTAGTGGCAGTGAACA   | 0, | 5  |
| TTAGGTAGTGGCAGTGAACAC  | 0, | 1  |
| TTAGGTAGTGGCAGTGAACAC  | 0, | 1  |
| TTAGGTAGTGGCAGTGAACA   | 0, | 5  |







CATGCACCACCACGCCTGGCT

1, 0

CCAGGCATGATGGTTCACGCCT

324, 2

CCAGGCATGATGGTTCACGCC

10, 0

CCAGGCATGATGGTTCACGCCTGT

1, 0

CCAGGCATGATGGTTCACG

0, 1

CAGGCATGATGGTTCACGCCT

28, 0

CAGGCATGATGGTTCACGCC

9, 0

CAGGCATGATGGTTCACGCCTGT

1, 0

AGGCATGATGGTTCACGCCTGT

1, 0

chr2 150186814-150186835

GCAAACCTCCGGCCAGCGGGAGCCGACCGCCCGGGCGCAGGTGGGGCACCCGGGCGCCGCGCTCCCGCCCGCAGGGTGAGC

((..((..((..((..(((.....))..))>>>>>->>->>>>>>>-->>..)))..))..))

CCGGCCAGCGGGAGCCGACCGCCCGGGC

1, 0

CGGCCAGCGGGAGCCGACCGCC

0, 1

AGCGGGAGCCGACCGCCCGG

1, 1

CGGGCGCCGCGCTCCCGCCCGC

70, 1

CGGGCGCCGCGCTCCCGCCCG

18, 4

CGGGCGCCGCGCTCCCGCCCGCA

8, 0

CGGGCGCCGCGCTCCCGCCC

4, 2

|                        |      |
|------------------------|------|
| CGGGCGCCGCGCTCCCGCC    | 1, 0 |
| GGGCGCCGCGCTCCCGCCCGC  | 3, 0 |
| GGGCGCCGCGCTCCCGCCCGCA | 1, 0 |

chr1 160312313-160312334

CCAGTTAAATTTGAATTTTCAGGTAAACAATGAATAGTTTTTTAGTCTGTCGTTGCTTACCAGAAGTTCAAATTTATCTGG

(((((.((((((((<<<<<<<-<<<<<-<<<<<-<((.....)))}}}}}}=}}}}=}}}}}}}})))))))).))))))

|                          |        |
|--------------------------|--------|
| GAATTTTCAGGTAAACAATGAAT  | 133, 1 |
| GAATTTTCAGGTAAACAATGAA   | 4, 0   |
| GAATTTTCAGGTAAACAATGA    | 3, 1   |
| GAATTTTCAGGTAAACAATGAATA | 1, 0   |
| AATTTTCAGGTAAACAATGAATA  | 1, 0   |
| AATTTTCAGGTAAACAATGAATAG | 1, 0   |
| GTCGTTGCTTACCAGAAGTTC    | 1, 0   |
| GTCGTTGCTTACCAGAAGTTCA   | 1, 1   |
| CGTTGCTTACCAGAAGTTCAA    | 3, 0   |

chr18 50403414-50403435

GTAAATTTGAATTTTCAGGTAAACAATGAATACATTTTTAGTATAAAATGTGTACCATGCAATATTTTAGACACAATTATATTAACATATTTCATGTTTATCTGAAATTCAAATTTAAC

(((((((((<<<<<<<<<<<<<<<<<<<(((((((((((.....)))))))).)))))))).)))))))).)))))))).)))))))).))))))



chr8 30927639-30927660

TATTAGGTTGGTGCAAAAATAATTGTGGTTTTGGTAATTTTTAATGGCAAAAACCACAATTACTTTTGCACCAACCTAATA

((((( (((((( (<<<<<<<-<<<<<<<<<<<<-((.(.....).).).)))))))))..)))))))))

|                         |         |
|-------------------------|---------|
| GTGCAAAAATAATTGTGGTTT   | 9, 1    |
| GTGCAAAAATAATTGTGGTT    | 1, 0    |
| GTGCAAAAATAATTGTGGT     | 1, 0    |
| GTGCAAAAATAATTGTGGTTTT  | 0, 1    |
| TGCAAAAATAATTGTGGTTTTG  | 289, 29 |
| TGCAAAAATAATTGTGGTTTT   | 12, 0   |
| TGCAAAAATAATTGTGGTTTTGG | 0, 4    |
| GCAAAAATAATTGTGGTTTTGG  | 6, 23   |
| GCAAAAATAATTGTGGTTTTG   | 3, 0    |
| GCAAAAATAATTGTGG        | 0, 1    |
| CAAAAATAATTGTGGTTTTGGT  | 1, 0    |
| TGGCAAAAACCACAATTACTTTT | 1, 0    |
| GCAAAAACCACAATTACTTTTGC | 6, 0    |
| GCAAAAACCACAATTACTTTTGG | 4, 0    |
| CAAAAACCACAATTACTTTTGC  | 41, 1   |
| CAAAAACCACAATTACTTTTGG  | 6, 1    |
| AAAAACCACAATTACTTTTGC   | 107, 2  |





chr1 1284690-1284711

GGCGCGGCCCGAGGGGCGCAGGCGGGAGGGCGGGGCTGAGCGCGCCCTCCGTGCTGCGTCCCTCGCGCCGCTCC

((.(((((.(((((((((((((((((.((((((((((((((.....)).>>>>>>->>>>>>>>>>>>>>>>>>.)))))))

|                                   |     |   |
|-----------------------------------|-----|---|
| AGGGGCGCAGGCGGGAGGGCGGC           | 3,  | 0 |
| AGGGGCGCAGGCGGGAGGGCGG            | 1,  | 0 |
| AGGGGCGCAGGCGGGAGGGCGGCG          | 1,  | 1 |
| AGGGGCGCAGGCGGGAGGGCG             | 0,  | 1 |
| GAGGGCGGGCGGGGCTGAGCGCGCCCTCCGTGC | 1,  | 0 |
| GGGGCTGAGCGCGCCCTCCGTGCTGCG       | 1,  | 0 |
| CGCCCTCCGTGCTGCGTCCCTCG           | 12, | 4 |
| GCCCTCCGTGCTGCGTCCCTCG            | 11, | 1 |
| GCCCTCCGTGCTGCGTCCCTC             | 2,  | 3 |
| CCCTCCGTGCTGCGTCCCTCGCGC          | 0,  | 1 |
| CCCTCCGTGCTGCGTCCCTCGC            | 0,  | 1 |
| CCCTCCGTGCTGCGTCCCTCG             | 0,  | 2 |
| CCCTCCGTGCTGCGTCCCTCGCG           | 0,  | 1 |

chr17 46720006-46720028

GCTGCTGACCGGCTCGGCGACTGCCTCCCTGCTGTGAGCAGGAGAACAGGAAGTCTGCCCGACAGGGAGGTGGCCGGGCGGGAGCGGC

(((((...(((((<<<--<<<<<<<<<<<<<<<<<<<<<(((.....))))))))).)))))))))

|                            |        |
|----------------------------|--------|
| CGGCGACTGCCTCCCTGCTGTGAGCA | 1, 0   |
| CGGCGACTGCCTCCCTGCTGTGAGC  | 0, 3   |
| CGGCGACTGCCTCCCTGCTGTGAG   | 0, 1   |
| GGCGACTGCCTCCCTGCTGTGAGC   | 51, 29 |
| GGCGACTGCCTCCCTGCTGTGAGCA  | 6, 1   |
| GGCGACTGCCTCCCTGCTGTGAG    | 4, 0   |
| GGCGACTGCCTCCCTGCTGTGA     | 2, 0   |
| GCGACTGCCTCCCTGCTGTGAGC    | 9, 89  |
| GCGACTGCCTCCCTGCTGTGAGCA   | 8, 21  |
| GCGACTGCCTCCCTGCTGTGAGCAG  | 0, 2   |
| CRACTGCCTCCCTGCTGTGAGCAG   | 0, 1   |
| ACTGCCTCCCTGCTGTGAGCA      | 2, 0   |
| AGGAGAACAGGAAGTCTGC        | 0, 1   |
| GGAGAACAGGAAGTCTG          | 1, 9   |
| TGCCCGACAGGGAGGTGGCCG      | 2, 0   |
| TGCCCGACAGGGAGGTGGCCGG     | 1, 0   |
| GCCCGACAGGGAGGTGGCCG       | 1, 0   |
| CCCGACAGGGAGGTGGCCGGG      | 2, 0   |









|                         |        |
|-------------------------|--------|
| TAAAGTAATTGCGTTTTTACT   | 6, 0   |
| TGGCAAAAACCACAATTACTTTT | 1, 0   |
| GCAAAAACCACAATTACTTTTGC | 6, 0   |
| GCAAAAACCACAATTACTTTTG  | 4, 0   |
| CAAAAACCACAATTACTTTTGC  | 41, 1  |
| CAAAAACCACAATTACTTTTG   | 6, 1   |
| AAAAACCACAATTACTTTTGCA  | 107, 2 |
| AAAAACCACAATTACTTTTGC   | 86, 0  |
| AAAAACCACAATTACTTTTGCAC | 6, 0   |
| AAAAACCACAATTACTTTTG    | 3, 0   |
| AAAACCACAATTACTTTTGCAC  | 84, 1  |
| AAAACCACAATTACTTTTGCA   | 17, 1  |
| AAAACCACAATTACTTTTGC    | 3, 0   |
| AAAACCACAATTACTTTTG     | 1, 0   |
| AAAACCACAATTACTTTTGCACC | 1, 0   |
| AAACCACAATTACTTTTGCACC  | 14, 10 |
| AAACCACAATTACTTTTGCAC   | 7, 0   |
| AACCACAATTACTTTTGCACCA  | 5, 1   |
| AACCACAATTACTTTTGCACC   | 3, 1   |
| ACCACAATTACTTTTGCACCA   | 25, 1  |

chr17 43012023-43012044

CTTCCTGTTAGGGGAAAAGTCCTGATCCGGAACCCACAGCCCCGTTCTGGGCTTCTCCTCTGTAGCCAGCCTCAGCCGAGCAGCTGCTGGAGATACTGACCAGGGGG

(((((---<<<<<<-<<<<<-<<--<<((.....))))).))..))))))..))))))((.((((...(((.....))))))..))))..))))))

|                          |                         |       |
|--------------------------|-------------------------|-------|
| GTTAGGGGAAAAGTCCTGATCCG  |                         | 1, 0  |
| TTAGGGGAAAAGTCCTGATCCG   |                         | 7, 0  |
| TTAGGGGAAAAGTCCTGATCC    |                         | 2, 0  |
| TTAGGGGAAAAGTCCTGATCCGG  |                         | 1, 7  |
| TTAGGGGAAAAGTCCTGATCCGGG |                         | 0, 1  |
| TAGGGGAAAAGTCCTGATCCGG   |                         | 5, 46 |
| TAGGGGAAAAGTCCTGATCCGGG  |                         | 1, 4  |
| TAGGGGAAAAGTCCTGATCCGGGA |                         | 0, 1  |
|                          | CGTTCCTGGGCTTCTCCTCTGT  | 0, 3  |
|                          | CGTTCCTGGGCTTCTCCTCTGTA | 0, 1  |
|                          | TTCCTGGGCTTCTCCTCTGTAG  | 0, 9  |
|                          | TCCTGGGCTTCTCCTCTGTA    | 0, 1  |
|                          | TCCTGGGCTTCTCCTCTGTAG   | 0, 1  |

chr1 63966764-63966785

GTAGGGACTGGATTCATTATTTTGCATGTGTATAACCAGTTACTGAAACAGATATCCACATGTAAAAAATGAATCTAGTCCCTAC

(((((({{{{={{{{{{{{{.(((..((.....))..))>->>>>>>>>>->>>>>>>))))))))))

TGGATTCATTATTTTGCATGTG 29, 3

TGGATTCATTATTTTGCATGT 1, 0

GGATTCATTATTTTGCATGTGT 1, 0

ATTCATTATTTTGCATGTGTA 1, 0

TTCATTATTTTGCATGTGTATA 5, 0

TTCATTATTTTGCATGTGTAT 3, 0

TTCATTATTTTGCATGTGTATAACC 1, 0

TCCACATGTAAAAAATGAATC 79, 97

TCCACATGTAAAAAATGAAT 16, 2

TCCACATGTAAAAAATGAATCT 2, 0

CATGTAAAAAATGAATCTAGT 0, 1

chr1 118397433-118397454

AACTCCTAGGTTTCGTGACCAGGGGAAATATCTGCTACCAGATTAGAGATTAAGGAAATCTTGTAGCAGGTATTTCCCTGGTAGGGGTT

(((((.....((((((((((((((((((((((.....))>>>->>>>>>>>>>>>>>>>>>>))))))))))))))

TCTTGTAGCAGGTATTTCCCT 12, 14

TCTTGTAGCAGGTATTTCCC 0, 4

CTTGTAGCAGGTATTTCCCT 0, 2



|                          |       |
|--------------------------|-------|
| TTATCCTCCAGTAGACTAGGGA   | 12, 3 |
| TTATCCTCCAGTAGACTAGGGAG  | 6, 3  |
| TTATCCTCCAGTAGACTAGGGAGC | 0, 1  |
| TATCCTCCAGTAGACTAGGGAGC  | 3, 4  |
| TATCCTCCAGTAGACTAGGGAG   | 0, 1  |
| ATCCTCCAGTAGACTAGGGAGC   | 1, 0  |

chr1 173804513-173804534

ACATGTGTGAGCCACCGCGCCCGGCCAATAGATTTGTTCTTAAAGAACCAATTCATTGGCTGGGCGCGGTGGCTCACGCCTGT

(((. (((((((((((((((((((((((((((((((((((((.. (((. ((((. . . . .))) .) )>-->>>>>>>>>>>>>>>>>>>))))).)))

|                        |      |
|------------------------|------|
| AATTCATTGGCTGGGCGCGGTG | 0, 1 |
| ATTCATTGGCTGGGCGCGGTGG | 1, 0 |
| TTCATTGGCTGGGCGCGGTGGC | 5, 3 |
| TTCATTGGCTGGGCGCGGTGG  | 0, 5 |
| TGGCTGGGCGCGGTGGCTCACG | 1, 0 |
| GGGCGCGGTGGCTCACGCCTG  | 2, 0 |
| GGCGCGGTGGCTCACGCCTGT  | 2, 0 |
| GCGCGGTGGCTCACGC       | 1, 0 |

chr20 50733230-50733251



GCAAATTATGCTGTTGGGCATATGTGTATATATGTGTATGTGTATATATGTGTATGTGTATGTGTACACATATGCCTAACAGCATAAATTTGT

(((((((((((((((<<<<<<<<<<<<<<<<<<<<<-.((((...)))..)}}}}}}}}}}}}}}}}}}}}}})))))))))

TTGGGCATATGTGTATATATGT 13, 1

TTGGGCATATGTGTATATATGT 13, 1

TTGGGCATATGTGTATATATGT 13, 1

TTGGGCATATGTGTATATATGT 13, 1

GTATGTACACATATGCCTAAC 12, 0

GTATGTACACATATGCCTAAC 12, 0

GTATGTACACATATGCCTAAC 12, 0

GTATGTACACATATGCCTAAC 12, 0

GTATGTACACATATGCCTAAC 2, 0

GTATGTACACATATGCCTAAC 2, 0

GTATGTACACATATGCCTAAC 2, 0

GTATGTACACATATGCCTAAC 2, 0
